# Supplementary material for: SoftPanel: a website for grouping diseases and related disorders for generation of customized panels
Source: PubMed Central journal article supplement (PMC4820874; doi:10.1186/s12859-016-0998-5), 2016-04-05

**A**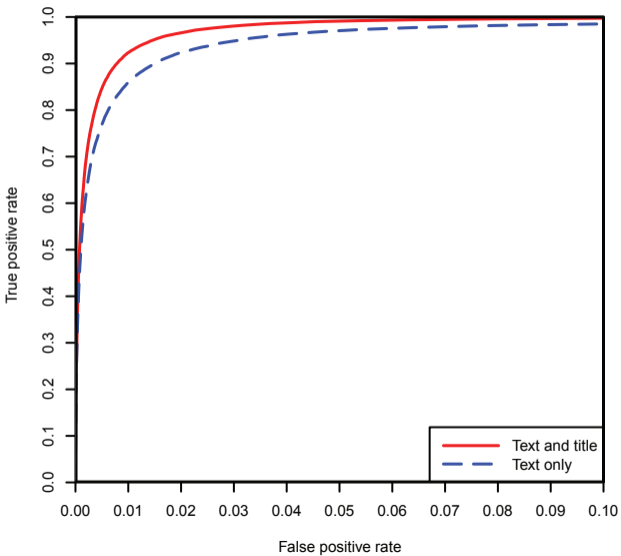**B**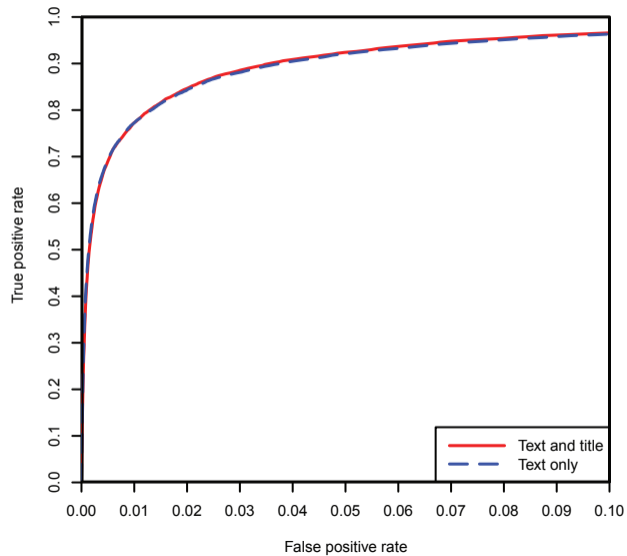

Supplement: 12859_2016_998_MOESM1_ESM.pdf [file 12859_2016_998_MOESM1_ESM.pdf]
